# Supplementary material
Source: PubMed Central journal article supplement (PMC7282781)
Supplement: mmc1.pdf [file mmc1.pdf]

**Table S1:** List of protein structures of different families selected for docking with identified SARS-CoV-2 enzymes binding molecule to evaluate the specificity

| <b>Protein ID</b> | <b>Protein Family ID</b> | <b>Protein ID</b> | <b>Protein Family ID</b>  |
|-------------------|--------------------------|-------------------|---------------------------|
| 5U7Z              | CBAH (PF02275)           | 3OHM              | G-alpha (PF00503)         |
| 5W45              | NAD1 (PF18778)           | 3PUF              | RNase_H2-Ydr279 (PF09468) |
| 4E49              | Carb_anhydrase (PF00194) | 3R4O              | HSP90 (PF00183)           |
| 1BL1              | 7tm_2 (PF00002)          | 3R6I              | Aldo_ket_red (PF00248)    |
| 1CWF              | Pro_isomerase (PF00160)  | 3UVU              | Arm (PF00514)             |
| 1HF0              | Pou (PF00157)            | 3WO2              | IL1 (PF00340)             |
| 1IKN              | Ank (PF00023)            | 3ZR0              | NUDIX (PF00293)           |
| 1JT3              | FGF (PF00167)            | 4A7U              | OSCP (PF00213)            |
| 1OE9              | 14-3-3 (PF00244)         | 4FAD              | PI3_PI4_kinase (PF00454)  |
| 1QE6              | IL8 (PF00048)            | 4GWG              | 6PGD (PF00393)            |
| 1W6K              | Prenyltrans (PF00432)    | 4IA0              | PDEase_I (PF00233)        |
| 1Z3U              | Fibrinogen_C (PF00147)   | 4IP9              | SAA (PF00277)             |
| 1ZXM              | DNA_gyraseB (PF00204)    | 4IRG              | Ets (PF00178)             |
| 2CF9              | Ycf9 (PF01737)           | 4JKJ              | Peptidase_C12 (PF01088)   |
| 2CZK              | Inositol_P (PF00459)     | 4JXJ              | RrnaAD (PF00398)          |
| 2FM5              | PDEase_I (PF00233)       | 4KTV              | S-AdoMet_synt_N (PF00438) |
| 2G6P              | Peptidase_M24 (PF00557)  | 4MWS              | Peptidase_S10 (PF00450)   |
| 2IYB              | LIM (PF00412)            | 4NY0              | FERM_M (PF00373)          |
| 2J0S              | Helicase_C (PF00271)     | 4NYH              | DSPc (PF00782)            |
| 2J8B              | UPAR_LY6 (PF00021)       | 4OJ2              | MIP (PF00230)             |
| 2Q7N              | fn3 (PF00041)            | 4U7D              | DEAD (PF00270)            |
| 2QFZ              | RabGAP-TBC (PF00566)     | 4URW              | RasGEF_N (PF00618)        |
| 2QX4              | Flavodoxin_2 (PF02525)   | 4UV8              | Myb_DNA-binding (PF00249) |
| 2UW9              | Pkinase_C (PF00433)      | 4W9O              | FKBP_C (PF00254)          |
| 2V5Y              | MAM (PF00629)            | 4WB7              | DnaJ (PF00226)            |
| 2X1X              | ig (PF00047)             | 4X1L              | Profilin (PF00235)        |
| 2XMS              | Ndr (PF03096)            | 4MXV              | TNF (PF00229)             |
| 3BYI              | RhoGAP (PF00620)         | 4Y5O              | PB1 (PF00564)             |

|      |                           |      |                          |
|------|---------------------------|------|--------------------------|
| 3DOF | Arf (PF00025)             | 4ZMV | Cadherin (PF00028)       |
| 3EHI | Thymidylat_synt (PF00303) | 4ZWJ | Arrestin_N (PF00339)     |
| 3EHT | HRM (PF02793)             | 5A2E | SRCR (PF00530)           |
| 3GR4 | PK (PF00224)              | 5AIU | ubiquitin (PF00240)      |
| 3H91 | Chromo (PF00385)          | 5C5X | MIP (PF00230)            |
| 3HRZ | A2M (PF00207)             | 5D1M | UQ_con (PF00179)         |
| 3I69 | GST_C (PF00043)           | 5F6D | UQ_con (PF00179)         |
| 3I7H | X (PF00739)               | 5FFG | Integrin_beta (PF00362)  |
| 3KLT | Filament (PF00038)        | 5FN3 | Presenilin (PF01080)     |
| 3MWE | Ligase_CoA (PF00549)      | 5FUG | YL1 (PF05764)            |
| 3OE9 | 7tm_1 (PF00001)           | 5GNT | Dynamin_N (PF00350)      |
| 5H0V | Transthyretin (PF00576)   | 5HZJ | PH_13 (PF16652)          |
| 5HEX | Hexokinase_1 (PF00349)    | 5IOH | Metallophos (PF00149)    |
| 5HKJ | C1q (PF00386)             | 5K10 | Iso_dh (PF00180)         |
| 5L6D | MT-A70 (PF05063)          | 5WG5 | RGS (PF00615)            |
| 5M3D | Tetraspanin (PF00335)     | 5Z90 | Bromodomain (PF00439)    |
| 5N7E | RhoGEF (PF00621)          | 6DK3 | SHMT (PF00464)           |
| 5OKF | Crystallin (PF00525)      | 6F39 | CUB (PF00431)            |
| 5POQ | Bromodomain (PF00439)     | 6FFI | Phage_lysozyme (PF00959) |
| 5T40 | Endonuclease_NS (PF01223) | 6PAX | PAX (PF00292)            |
| 5UZP | Citrate_synt (PF00285)    | 4GWN | MAM (PF00629)            |
| 5VZ3 | TGF_beta (PF00019)        | 3VJ9 | SQS_PSY (PF00494)        |

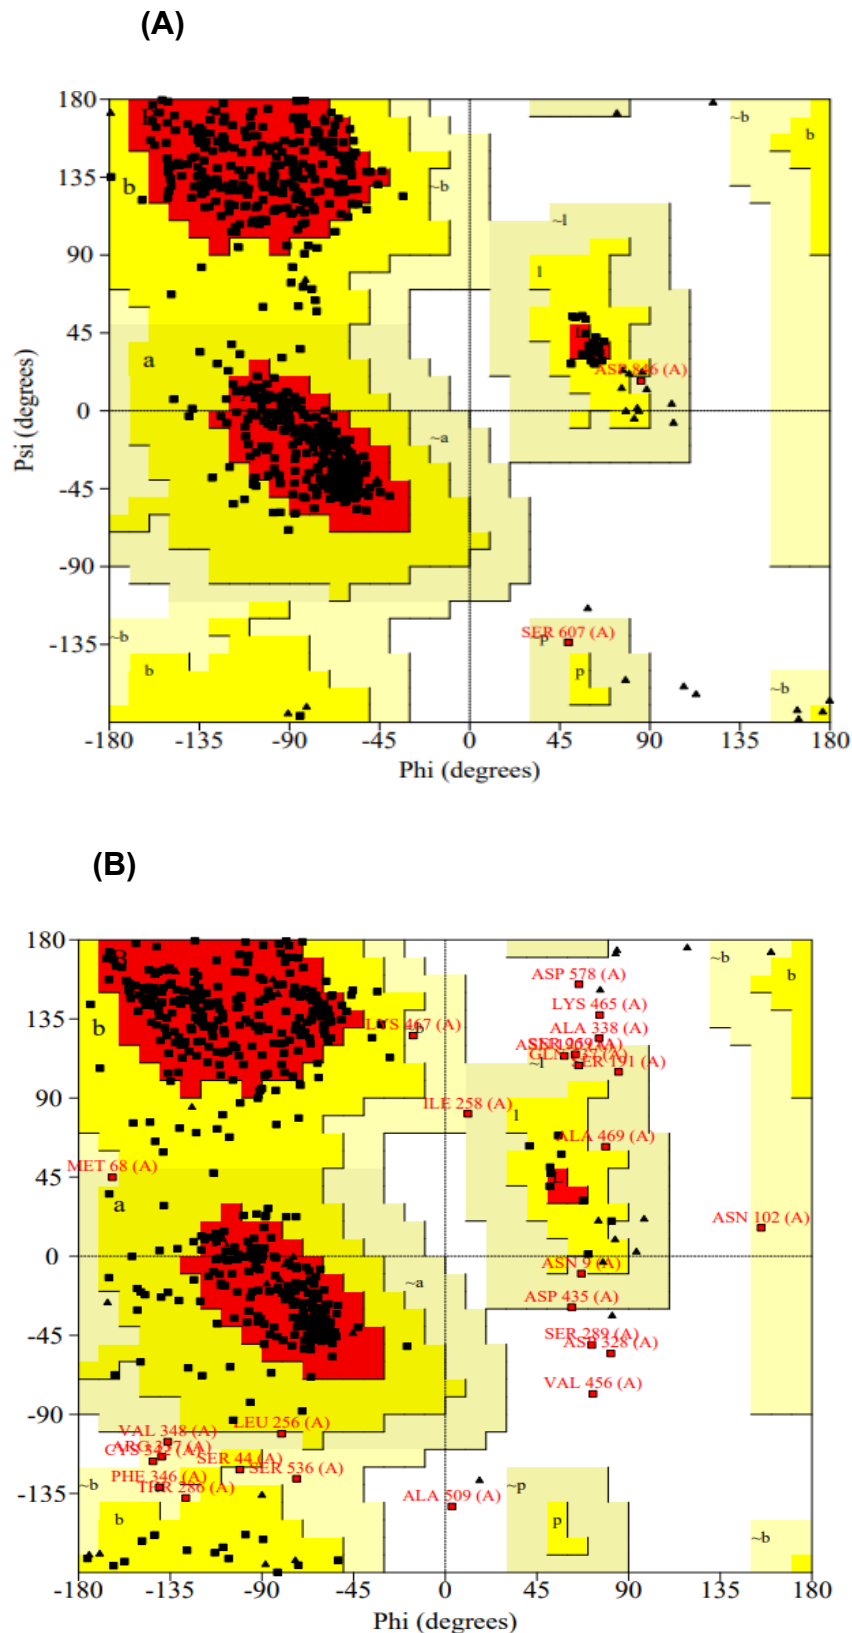

**Figure S1:** Ramachandran plot analysis of homology models (A) SARS-CoV-2RdRp and (B) SARS-CoV-2 helicase. The most favorable regions are marked as A, B and L (red). The additional allowed regions are marked as a, b, l, p (dark yellow). All residues except glycine and proline, are represented as filled black squares, glycine residues are shown as filled triangles. Disallowed residues are filled red.

**Table S2: Summary of main-chain parameters of SARS-CoV-2 RdRp homology model**

| Stereochemical parameter | No of data points | Parameter value | Comparison typical value | Value band width | No. of band width from mean | Interpretation |
|--------------------------|-------------------|-----------------|--------------------------|------------------|-----------------------------|----------------|
| % residues in A, B, L    | 735               | 92.5            | 88.2                     | 10.0             | 0.4                         | INSIDE         |
| Omega angle St. Dev.     | 801               | 6.1             | 6.0                      | 3.0              | 0.0                         | INSIDE         |
| Bad Contact/100 Residues | 0                 | 0.0             | 1.0                      | 10.0             | -0.1                        | INSIDE         |
| Zeta angle St. Dev.      | 763               | 2.0             | 3.1                      | 1.6              | -0.7                        | INSIDE         |
| H-bond Energy St. Dev.   | 501               | 0.8             | 0.7                      | 0.2              | 0.3                         | INSIDE         |
| Overall G-Factor         | 805               | -0.0            | -0.2                     | 0.3              | 0.5                         | INSIDE         |

St. Dev. Represent the standard deviation of observed scores. The structure accuracy can be interpreted in the order BETTER> INSIDE> WORSE for each parameter

**Table S3: Summary of side-chain parameters of SARS-CoV-2 RdRp homology model**

| Stereochemical parameter  | No of data points | Parameter value | Comparison typical value | Value band width | No. of band width from mean | Interpretation |
|---------------------------|-------------------|-----------------|--------------------------|------------------|-----------------------------|----------------|
| Chi-1 gauche minus St.Dev | 99                | 8.7             | 13.6                     | 6.5              | -0.7                        | INSIDE         |
| Chi-1 trans St. Dev.      | 236               | 8.4             | 15.3                     | 5.3              | -1.3                        | BETTER         |
| Chi-1 gauche plus St.Dev  | 348               | 8.2             | 13.8                     | 4.9              | -1.1                        | BETTER         |
| Chi-1 pooled St. Dev.     | 683               | 8.4             | 14.3                     | 4.8              | -1.2                        | BETTER         |
| Chi-2 trans St. Dev.      | 180               | 9.6             | 17.7                     | 5.0              | -1.6                        | BETTER         |

St. Dev. Represent the standard deviation of observed scores. The structure accuracy can be interpreted in the order BETTER> INSIDE> WORSE for each parameter

**Table S4: Summary of main-chain parameters of SARS-CoV-2 helicase homology model**

| Stereochemical parameter | No of data points | Parameter value | Comparison typical value | Value band width | No. of band width from mean | Interpretation |
|--------------------------|-------------------|-----------------|--------------------------|------------------|-----------------------------|----------------|
| % residues in A, B, L    | 512               | 80.5            | 88.2                     | 10.0             | -0.8                        | INSIDE         |
| Omega angle St. Dev.     | 591               | 8.5             | 6.0                      | 3.0              | 0.8                         | INSIDE         |
| Bad Contact/100 Residues | 2                 | 0.3             | 1.0                      | 10.0             | -0.1                        | INSIDE         |
| Zeta angle St. Dev.      | 564               | 2.4             | 3.1                      | 1.6              | -0.5                        | INSIDE         |
| H-bond Energy St. Dev.   | 300               | 0.8             | 0.7                      | 0.2              | 0.7                         | INSIDE         |
| Overall G-Factor         | 599               | -0.4            | -0.2                     | 0.3              | -0.7                        | INSIDE         |

**Table S5: Summary of side-chain parameters of SARS-CoV-2 Helicase Homology model**

| Stereochemical parameter  | No of data points | Parameter value | Comparison typical value | Value band width | No. of band width from mean | Interpretation |
|---------------------------|-------------------|-----------------|--------------------------|------------------|-----------------------------|----------------|
| Chi-1 gauche minus St.Dev | 96                | 15.8            | 13.6                     | 6.5              | 0.3                         | INSIDE         |
| Chi-1 trans St. Dev.      | 155               | 16.9            | 15.3                     | 5.3              | 0.3                         | INSIDE         |
| Chi-1 gauche plus St.Dev  | 238               | 15.3            | 13.8                     | 4.9              | 0.3                         | INSIDE         |
| Chi-1 pooled St. Dev.     | 489               | 16.3            | 14.3                     | 4.8              | 0.4                         | INSIDE         |
| Chi-2 trans St. Dev.      | 115               | 20.3            | 17.7                     | 5.0              | 0.5                         | INSIDE         |

St. Dev. Represent the standard deviation of observed scores. The structure accuracy can be interpreted in the order BETTER> INSIDE> WORSE for each parameter

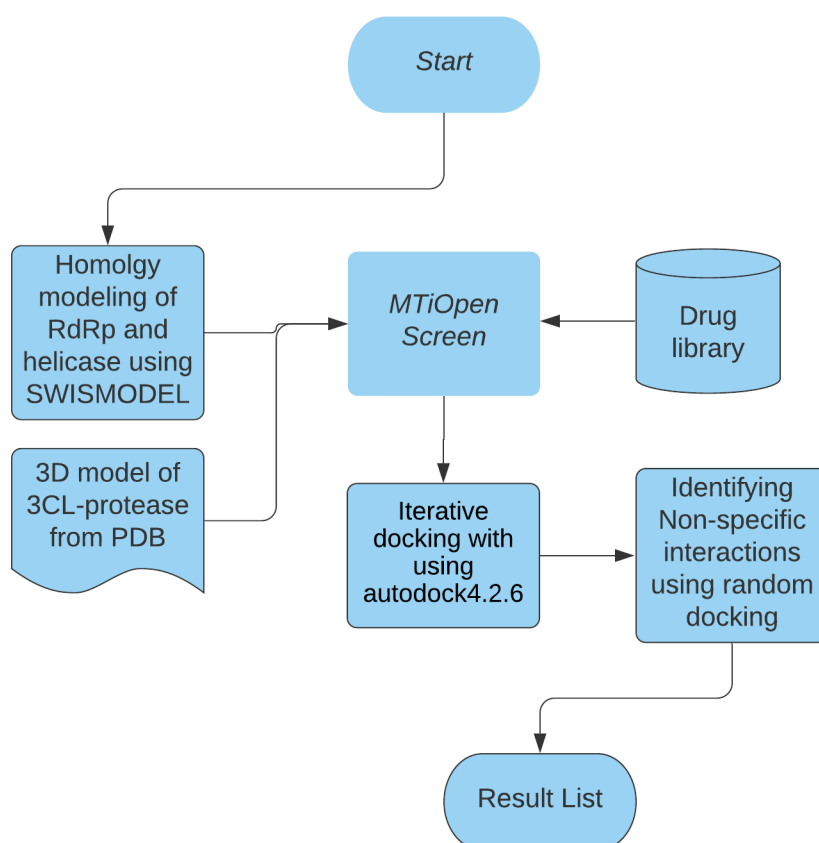

Figure S2: Framework of the computational method to identify potential inhibitors of three viral proteins.
